# Supplementary material
Source: ML conference proceedings conference paper supplement (https://proceedings.mlr.press/v37/qiu15.html)
Supplement: Supplementary file 1 [file qiu15-supp.pdf]

---

# Supplementary Material to Robust Estimation of Transition Matrices in High Dimensional Heavy-tailed Vector Autoregressive Processes

---

**Huitong Qiu**

Johns Hopkins University, 615 N. Wolfe St., Baltimore, MD 21210 USA

HQIU7@JHU.EDU

**Sheng Xu**

Johns Hopkins University, 615 N. Wolfe St., Baltimore, MD 21210 USA

SHXU@JHU.EDU

**Fang Han**

Johns Hopkins University, 615 N. Wolfe St., Baltimore, MD 21210 USA

FHAN@JHU.EDU

**Han Liu**

Princeton University, 98 Charlton Street, Princeton, NJ 08544 USA

HANLIU@PRINCETON.EDU

**Brian Caffo**

Johns Hopkins University, 615 N. Wolfe St., Baltimore, MD 21210 USA

BCAFFO@JHU.EDU

## A. Technical Proofs

### A.1. Supporting Lemmas

**Lemma A.1.** *Let  $\{X_t\}_{t \in \mathbb{Z}}$  be an absolutely continuous stationary process with  $\phi$ -mixing coefficient  $\phi(n)$ . Define  $U$ -statistic*

$$U_T(K_u) := \frac{2}{T(T-1)} \sum_{1 \leq s < t \leq T} K_u(X_s, X_t), \quad (\text{A.1})$$

for kernel function  $K_u(x, y) := I(|x - y| \leq u)$ . Let  $\tilde{X}_1$  be an independent copy of  $X_1$ , and  $G(u) := \mathbb{P}(|X_1 - \tilde{X}_1| \leq u)$  be the distribution function of  $|X_1 - \tilde{X}_1|$ . Then, we have

$$|\mathbb{E}U_T(K_u) - G(u)| \leq \frac{2\phi_T}{T},$$

for any  $u > 0$ , where  $\phi_T = \sum_{n=1}^T \phi(n)$ .

*Proof.* Denote  $G_{st}(u) := \mathbb{P}(|X_s - X_t| \leq u)$  to be the distribution function of  $|X_s - X_t|$  for  $s < t$ . Let  $M > 0$  be a constant and

$$-M = a_{-h}^{(h)} < \dots < a_0^{(h)} < \dots < a_h^{(h)} = M$$

be a sequence of real numbers satisfying

$$\begin{aligned} \max_{-h < k \leq h} (a_k^{(h)} - a_{k-1}^{(h)}) &\leq u, \\ \lim_{h \rightarrow \infty} \max_{-h < k \leq h} (a_k^{(h)} - a_{k-1}^{(h)}) &= 0. \end{aligned} \quad (\text{A.2})$$

Given  $X_s \in [a_{k-1}^{(h)}, a_k^{(h)}]$ , we have that  $|X_s - X_t| \leq u$  implies  $X_t \in [a_{k-1}^{(h)} - u, a_k^{(h)} + u]$ . Thus, we have

$$\begin{aligned} &\mathbb{P}(|X_s - X_t| \leq u, X_s \in [-M, M]) \\ &= \sum_{-h < k \leq h} \mathbb{P}(|X_s - X_t| \leq u | X_s \in [a_{k-1}, a_k]) \mathbb{P}(X_s \in [a_{k-1}, a_k]) \\ &\leq \sum_{-h < k \leq h} \mathbb{P}(X_t \in [a_{k-1}^{(h)} - u, a_k^{(h)} + u] | X_s \in [a_{k-1}, a_k]) \cdot \\ &\quad \mathbb{P}(X_s \in [a_{k-1}, a_k]). \end{aligned} \quad (\text{A.3})$$

On the other hand, given  $X_s \in [a_{k-1}^{(h)}, a_k^{(h)}]$ , we have  $X_t \in [a_k^{(h)} - u, a_{k-1}^{(h)} + u]$  implies  $|X_s - X_t| \leq u$ . Thus, we have

$$\begin{aligned} &\mathbb{P}(|X_s - X_t| \leq u, X_s \in [-M, M]) \\ &= \sum_{-h < k \leq h} \mathbb{P}(|X_s - X_t| \leq u | X_s \in [a_{k-1}, a_k]) \mathbb{P}(X_s \in [a_{k-1}, a_k]) \\ &\geq \sum_{-h < k \leq h} \mathbb{P}(X_t \in [a_k^{(h)} - u, a_{k-1}^{(h)} + u] | X_s \in [a_{k-1}, a_k]) \cdot \\ &\quad \mathbb{P}(X_s \in [a_{k-1}, a_k]). \end{aligned} \quad (\text{A.4})$$

Now define  $\psi_h^U := \sum_{-h < k \leq h} \mathbb{P}(X_t \in [a_{k-1}^{(h)} - u, a_k^{(h)} + u]) \mathbb{P}(X_s \in [a_{k-1}, a_k])$ ,  $\psi_h^L := \sum_{-h < k \leq h} \mathbb{P}(X_t \in [a_k^{(h)} - u, a_{k-1}^{(h)} + u]) \mathbb{P}(X_s \in [a_{k-1}, a_k])$ , and

$$\psi_h := \begin{cases} \psi_h^L, & \text{if } \mathbb{P}(|X_s - X_t| \leq u, X_s \in [-M, M]) > \psi_h^L; \\ \psi_h^U, & \text{otherwise.} \end{cases}$$

Note that  $\psi_h^L \leq \psi_h^U$ . If  $\mathbb{P}(|X_s - X_t| \leq u, X_s \in [-M, M]) > \psi_h^L$ , by the definition of  $\psi_h$  and (A.3), we

have

$$\begin{aligned}
 & |\mathbb{P}(|X_s - X_t| \leq u, X_s \in [-M, M]) - \psi_h| \\
 &= \mathbb{P}(|X_s - X_t| \leq u, X_s \in [-M, M]) - \psi_h^L \\
 &\leq \sum_{-h < k \leq h} |\mathbb{P}(X_t \in [a_{k-1}^{(h)} - u, a_k^{(h)} + u] | X_s \in [a_{k-1}, a_k]) - \\
 &\quad \mathbb{P}(X_t \in [a_k^{(h)} - u, a_{k-1}^{(h)} + u])| \mathbb{P}(X_s \in [a_{k-1}, a_k]) \\
 &\leq \sum_{-h < k \leq h} |\mathbb{P}(X_t \in [a_{k-1}^{(h)} - u, a_k^{(h)} + u] | X_s \in [a_{k-1}, a_k]) - \\
 &\quad \mathbb{P}(X_t \in [a_{k-1}^{(h)} - u, a_k^{(h)} + u])| \mathbb{P}(X_s \in [a_{k-1}, a_k]) \\
 &+ \sum_{-h < k \leq h} |\mathbb{P}(X_t \in [a_{k-1}^{(h)} - u, a_k^{(h)} + u]) - \mathbb{P}(X_t \in \\
 &\quad [a_k^{(h)} - u, a_{k-1}^{(h)} + u])| \mathbb{P}(X_s \in [a_{k-1}, a_k]) \\
 &\leq \phi(t-s) + \max_{-h < k \leq h} |\mathbb{P}(X_t \in [a_{k-1}^{(h)} - u, a_k^{(h)} + u]) - \\
 &\quad \mathbb{P}(X_t \in [a_k^{(h)} - u, a_{k-1}^{(h)} + u])|. \tag{A.5}
 \end{aligned}$$

On the other hand, if  $\mathbb{P}(|X_s - X_t| \leq u, X_s \in [-M, M]) \leq \psi_h^L$ , since  $\psi_h^L \leq \psi_h^U$ , by the definition of  $\psi_h$  and (A.4), we have

$$\begin{aligned}
 & |\mathbb{P}(|X_s - X_t| \leq u, X_s \in [-M, M]) - \psi_h| \\
 &= \psi_h^U - \mathbb{P}(|X_s - X_t| \leq u, X_s \in [-M, M]) \\
 &\leq \sum_{-h < k \leq h} |\mathbb{P}(X_t \in [a_{k-1}^{(h)} - u, a_k^{(h)} + u]) - \mathbb{P}(X_t \in [a_k^{(h)} - u, \\
 &\quad a_{k-1}^{(h)} + u] | X_s \in [a_{k-1}, a_k])| \mathbb{P}(X_s \in [a_{k-1}, a_k]) \\
 &\leq \sum_{-h < k \leq h} |\mathbb{P}(X_t \in [a_k^{(h)} - u, a_{k-1}^{(h)} + u] | X_s \in [a_{k-1}, a_k]) - \\
 &\quad \mathbb{P}(X_t \in [a_{k-1}^{(h)} - u, a_k^{(h)} + u])| \mathbb{P}(X_s \in [a_{k-1}, a_k]) \\
 &+ \sum_{-h < k \leq h} |\mathbb{P}(X_t \in [a_k^{(h)} - u, a_{k-1}^{(h)} + u]) - \mathbb{P}(X_t \in \\
 &\quad [a_{k-1}^{(h)} - u, a_k^{(h)} + u])| \mathbb{P}(X_s \in [a_{k-1}, a_k]) \\
 &\leq \phi(t-s) + \max_{-h < k \leq h} |\mathbb{P}(X_t \in [a_k^{(h)} - u, a_{k-1}^{(h)} + u]) - \\
 &\quad \mathbb{P}(X_t \in [a_{k-1}^{(h)} - u, a_k^{(h)} + u])|. \tag{A.6}
 \end{aligned}$$

Thus, combining (A.5) and (A.6), we have

$$\begin{aligned}
 & |\mathbb{P}(|X_s - X_t| \leq u, X_s \in [-M, M]) - \psi_h| \\
 &\leq \phi(t-s) + \max_{-h < k \leq h} |\mathbb{P}(X_t \in [a_k^{(h)} - u, a_{k-1}^{(h)} + u]) - \\
 &\quad \mathbb{P}(X_t \in [a_{k-1}^{(h)} - u, a_k^{(h)} + u])|.
 \end{aligned}$$

Let  $h \rightarrow \infty$ . Using (A.2) and the assumption that  $X_t$  is absolutely continuous, we have

$$\begin{aligned}
 & |\mathbb{P}(|X_s - X_t| \leq u, X_s \in [-M, M]) - \\
 & \int_{-M}^M \mathbb{P}(X_s \in [a - u, a + u]) d\mathbb{P}(X_s = a)| \leq \phi(t-s).
 \end{aligned}$$

Now, let  $M \rightarrow \infty$ , we further obtain

$$\begin{aligned}
 & |\mathbb{P}(|X_s - X_t| \leq u) - \int \mathbb{P}(X_s \in [a-t, a+t]) d\mathbb{P}(X_s = a)| \\
 & \leq \phi(t-s).
 \end{aligned}$$

Noting that

$$\begin{aligned}
 & \int \mathbb{P}(X_s \in [a-u, a+u]) d\mathbb{P}(X_s = a) \\
 &= \int \mathbb{P}(X_s \in [a-u, a+u]) d\mathbb{P}(\tilde{X} = a) \\
 &= \mathbb{P}(|X_1 - \tilde{X}| \leq u) = G(u),
 \end{aligned}$$

we have  $|\mathbb{P}(|X_s - X_t| \leq u) - G(u)| \leq \phi(t-s)$ . Hence, we have

$$\begin{aligned}
 & |\mathbb{E}U_T(\phi_u) - G(u)| \\
 & \leq \frac{2}{T(T-1)} \sum_{1 \leq s < t \leq T} |\mathbb{P}(|X_s - X_t| \leq u) - G(u)| \\
 & \leq \frac{2}{T(T-1)} \sum_{1 \leq s < t \leq T} \phi(t-s) \\
 & = \frac{2}{T(T-1)} \sum_{k=1}^{T-1} (T-k)\phi(k) = \frac{2\phi_T}{T}.
 \end{aligned}$$

This completes the proof.  $\square$

**Lemma A.2.** Let  $\{X_t\}_{t \in \mathbb{Z}}$  be a stationary process with  $\phi$ -mixing coefficient  $\phi(n)$ , and  $U_T(K_u)$  be defined in (A.1). Then, for any  $u > 0$ , we have

$$\mathbb{P}\{|U_T(K_u) - \mathbb{E}U_T(K_u)| \geq \tau\} \leq 2 \exp\left\{-\frac{T\tau^2}{2(1+2\phi_T)}\right\}$$

for any  $\tau > 0$ , where  $\phi_T = \sum_{n=1}^T \phi(n)$ .

The following lemma is needed for proving Lemma A.2

**Lemma A.3.** (Kontorovich et al., 2008; Mohri & Ros-tamizadeh, 2010) Let  $f : \Omega^T \rightarrow \mathbb{R}$  be a measurable function that is  $M$ -Lipschitz with respect to the Hamming metric for some  $M > 0$ :

$$\sup_{x_1, \dots, x_T, x'_t} |f(x_1, \dots, x_t, \dots, x_T) - f(x_1, \dots, x'_t, \dots, x_T)| \leq M.$$

Then, for a stationary process  $\{X_t\}_{t \in \mathbb{Z}}$  with  $\phi$ -mixing coefficient  $\phi(n)$ , we have

$$\begin{aligned}
 & \mathbb{P}\{|f(X_1, \dots, X_T) - \mathbb{E}f(X_1, \dots, X_T)| \geq \tau\} \\
 & \leq 2 \exp\left[-\frac{2\tau^2}{M^2 T \{1 + 2 \sum_{k=1}^T \phi(k)\}}\right].
 \end{aligned}$$

for any  $\tau > 0$ .

*Proof of Lemma A.2.* Let

$$f(x_1, \dots, x_T) := TU_T(K_u) = \frac{2}{T-1} \sum_{s < t} I(|x_s - x_t| \leq u).$$

since replacing an element in  $(x_1, \dots, x_T)$ , say,  $x_t$ , by  $x'_t$  only affects  $T-1$  terms in the summation above, we have

$$|f(x_1, \dots, x_t, \dots, x_T) - f(x_1, \dots, x'_t, \dots, x_T)| \leq 2.$$

Thus, by Lemma A.3, we have

$$\begin{aligned} & \mathbb{P}\{T|U_T(K_u) - \mathbb{E}U_T(K_u)| \geq \tau\} \\ & \leq 2 \exp\left[-\frac{\tau^2}{2T\{1 + 2\sum_{k=1}^T \phi(k)\}}\right] \end{aligned}$$

for any  $\tau > 0$ . Replacing  $\tau$  with  $T\tau$  in the above equation, we obtain

$$\begin{aligned} & \mathbb{P}\{|U_T(K_u) - \mathbb{E}U_T(K_u)| \geq \tau\} \\ & \leq 2 \exp\left[-\frac{T\tau^2}{2\{1 + 2\phi_T\}}\right] \end{aligned}$$

This completes the proof.  $\square$

**Lemma A.4.** Let  $\{X_t\}_{t \in \mathbb{Z}}$  be an absolutely continuous stationary process with  $\phi$ -mixing coefficient  $\phi(n)$ . Let  $U_T(K_u)$  and  $G(u)$  be defined as in Lemma A.1. Then, for any  $u > 0$ , we have

$$\mathbb{P}\{|U_T(K_u) - G(u)| \geq \tau\} \leq 2 \exp\left\{-\frac{T}{2(1+2\phi_T)}\left(\tau - \frac{2\phi_T}{T}\right)^2\right\}$$

for  $\tau > 2\phi_T/T$  and  $\phi_T = \sum_{n=1}^T \phi(n)$ .

*Proof.* Using Lemma A.1, we have

$$\begin{aligned} & \mathbb{P}\{|U_T(K_u) - G(u)| \geq \tau\} \\ & \leq \mathbb{P}\{|U_T(K_u) - \mathbb{E}U_T(K_u)| + |\mathbb{E}U_T(K_u) - G(u)| \geq \tau\} \\ & \leq \mathbb{P}\left\{|U_T(K_u) - \mathbb{E}U_T(K_u)| \geq \tau - \frac{2\phi_T}{T}\right\}. \end{aligned}$$

Applying Lemma A.2 completes the proof.  $\square$

**Lemma A.5.** Let  $\{X_t\}_{t \in \mathbb{Z}}$  be a stationary process with  $\phi$ -mixing coefficient  $\phi(n)$ . Let  $\tilde{X}_1$  be an independent copy of  $X_1$ , and  $q \in [0, 1]$  be an absolute constant. Suppose the following assumptions hold:

1.  $Q(|X_1 - \tilde{X}_1|; q)$  and  $\widehat{Q}(\{|X_s - X_t\}_{1 \leq s < t \leq T}; q)$  are unique with probability 1.
2. There exist constants  $\kappa > 0$  and  $\eta > 0$  such that

$$\inf_{|y - Q(|X_1 - \tilde{X}_1|; q)| \leq \kappa} \frac{d}{dy} G(y) \geq \eta,$$

where  $G$  is the distribution function of  $|X_1 - \tilde{X}_1|$ .

Then, we have

$$\begin{aligned} & \mathbb{P}\left[|\widehat{Q}(\{|X_s - X_t\}_{1 \leq s < t \leq T}; q) - Q(|X_1 - \tilde{X}_1|; q)| \geq u\right] \\ & \leq 2 \exp\left\{-\frac{T}{2(1+2\phi_T)}\left(\eta u - \frac{4\phi_T}{T}\right)^2\right\}, \end{aligned} \quad (\text{A.7})$$

when  $4\phi_T/(\eta T) \leq u \leq \kappa$ . Here  $\phi_T = \sum_{n=1}^T \phi(n)$ .

*Proof.* We denote by  $G_T$  the empirical distribution function of  $\{|X_s - X_t\}_{1 \leq s < t \leq T}$ .  $G_T$  is non-decreasing and since  $\widehat{Q}(\{|X_s - X_t\}_{1 \leq s < t \leq T}; q)$  is unique, we have

$$q \leq G_T\{\widehat{Q}(\{|X_s - X_t\}_{1 \leq s < t \leq T}; q)\} \leq q + \frac{2}{T(T-1)}.$$

Denote  $G^{-1}(q) = Q(|X_1 - \tilde{X}_1|; q)$ . Since  $Q(|X_1 - \tilde{X}_1|; q)$  is unique, we have  $G\{G^{-1}(q)\} = q$ . Thus, we have

$$\begin{aligned} & \mathbb{P}\left[\widehat{Q}(\{|X_s - X_t\}_{1 \leq s < t \leq T}; q) - Q(|X_1 - \tilde{X}_1|; q) \geq u\right] \\ & \leq \mathbb{P}\left[G_T\{\widehat{Q}(\{|X_s - X_t\}_{1 \leq s < t \leq T}; q)\} \geq G_T\{G^{-1}(q) + u\}\right] \\ & \leq \mathbb{P}\left[q + \frac{2}{T(T-1)} \geq U_T\{\psi_{G^{-1}(q)+u}\}\right] \\ & = \mathbb{P}\left[-U_T\{\psi_{G^{-1}(q)+u}\} + G\{G^{-1}(q) + u\} \geq\right. \\ & \quad \left. G\{G^{-1}(q) + u\} - q - \frac{2}{T(T-1)}\right], \end{aligned}$$

where  $U_T\{\psi_{G^{-1}(q)+u}\}$  is defined in Lemma A.1. By Assumption 2, we have  $G\{G^{-1}(q) + u\} - q \leq \eta$  when  $u \leq \kappa$ . Now, using Lemma A.1, we have

$$\begin{aligned} & \mathbb{P}\left[\widehat{Q}(\{|X_s - X_t\}_{1 \leq s < t \leq T}; q) - Q(|X_1 - \tilde{X}_1|; q) \geq u\right] \\ & \leq \mathbb{P}\left[|U_T\{\psi_{G^{-1}(q)+u}\} - G\{G^{-1}(q) + u\}| \geq \eta u - \frac{2}{T(T-1)}\right] \\ & \leq 2 \exp\left[-\frac{T}{2(1+2\phi_T)}\left\{\eta u - \frac{2}{T(T-1)} - \frac{2\phi_T}{T}\right\}^2\right] \\ & \leq 2 \exp\left[-\frac{T}{2(1+2\phi_T)}\left\{\eta u - \frac{4\phi_T}{T}\right\}^2\right], \end{aligned} \quad (\text{A.8})$$

provided that  $4\phi_T/(\eta T) \leq u \leq \kappa$ . On the other hand, using the same technique, we have

$$\begin{aligned} & \mathbb{P}\left[\widehat{Q}(\{|X_s - X_t\}_{1 \leq s < t \leq T}; q) - Q(|X_1 - \tilde{X}_1|; q) \leq -u\right] \\ & \leq \mathbb{P}\left[G_T\{\widehat{Q}(\{|X_s - X_t\}_{1 \leq s < t \leq T}; q)\} \leq G_T\{G^{-1}(q) - u\}\right] \\ & \leq \mathbb{P}\left[U_T\{\psi_{G^{-1}(q)-u}\} - G\{G^{-1}(q) - u\} \geq q - G\{G^{-1}(q) - u\}\right] \\ & \leq \mathbb{P}\left[|U_T\{\psi_{G^{-1}(q)-u}\} - G\{G^{-1}(q) - u\}| \geq \eta u\right] \\ & \leq 2 \exp\left\{-\frac{T}{2(1+2\phi_T)}\left(\eta u - \frac{2\phi_T}{T}\right)^2\right\}, \end{aligned} \quad (\text{A.9})$$

provided that  $2\phi_T/(\eta T) \leq u \leq \kappa$ . Combining (A.8) and (A.9) completes the proof.  $\square$

## A.2. Proof of Main Results

### A.2.1. PROOF OF LEMMA 3.4

*Proof.* Part 1 of Lemma 3.4 is immediate by the definition of  $\mathbf{L}$  and Proposition 2.3.

To prove Part 2, we start with sufficiency. Suppose Equations (3.6) - (3.9) hold. Since  $(\mathbf{X}_t^\top, \mathbf{E}_{t+1}^\top)^\top$  can be obtained by a linear transformation of  $\mathbf{L}$ , by Proposition 2.3, we have

$$\begin{pmatrix} \mathbf{X}_t \\ \mathbf{E}_{t+1} \end{pmatrix} \sim \text{EC}_{2d}(\mathbf{0}, \begin{pmatrix} [\boldsymbol{\Omega}_X]_{I_t I_t} & [\boldsymbol{\Omega}_{XE}]_{I_t I_t} \\ [\boldsymbol{\Omega}_{XE}]_{I_t I_t}^\top & [\boldsymbol{\Omega}_E]_{I_t I_t} \end{pmatrix}, \xi)$$

for some random variable  $\xi$ . By (3.6) and (3.5), we have  $[\boldsymbol{\Omega}_X]_{I_t I_t} = \boldsymbol{\Sigma}$  and  $[\boldsymbol{\Omega}_E]_{I_t I_t} = \boldsymbol{\Psi}$ ; by (3.9), we have  $[\boldsymbol{\Omega}_{XE}]_{I_t I_t} = \mathbf{0}$ . Thus, Condition 2 in Definition 3.1 hold.

To prove necessity, suppose that  $\mathbf{L}$  satisfies Condition 2 in Definition 3.1. By stationarity of  $\{\mathbf{X}_t\}_{t=1}^T$ , the diagonal blocks of  $\boldsymbol{\Omega}_X$  equal  $\boldsymbol{\Sigma}$ . Thus, we have (3.6). On the other hand, since  $\mathbf{L} = \mathbf{B}\mathbf{L}_0$  and  $\mathbf{L}_0 \sim \text{EC}_{Td}(\mathbf{0}, \text{diag}(\boldsymbol{\Sigma}, \boldsymbol{\Psi}, \dots, \boldsymbol{\Psi}), \zeta)$ , by Proposition 2.3, we have  $\boldsymbol{\Omega} = \mathbf{B}\text{diag}(\boldsymbol{\Sigma}, \boldsymbol{\Psi}, \dots, \boldsymbol{\Psi})\mathbf{B}^\top$ . Plugging in the definition of  $\mathbf{B}$ , we have (3.9). Comparing the leading  $T$  diagonal blocks of  $\mathbf{B}\text{diag}(\boldsymbol{\Sigma}, \boldsymbol{\Psi}, \dots, \boldsymbol{\Psi})\mathbf{B}^\top$  with those of  $\boldsymbol{\Omega}_X$ , we have (3.7). Plugging (3.7) into the off-diagonal blocks of  $\mathbf{B}\text{diag}(\boldsymbol{\Sigma}, \boldsymbol{\Psi}, \dots, \boldsymbol{\Psi})\mathbf{B}^\top$ , we obtain (3.8). This completes the proof.  $\square$

### A.2.2. PROOF OF THEOREM 3.6

*Proof.* To prove Theorem 3.6, we first introduce an equivalent definition of elliptical random vectors. Specifically,  $\mathbf{X}$  is an elliptical random vector with location  $\boldsymbol{\mu}$  and scatter  $\mathbf{S}$  if and only if the characteristic function of  $\mathbf{X}$  is  $\psi_{\mathbf{X}}(\mathbf{t}) = \exp(it^\top \boldsymbol{\mu})\varphi(\mathbf{t}^\top \mathbf{S}\mathbf{t})$  for some function  $\varphi$  (Fang et al., 1990).

Let  $\mathbf{R} := (\mathbf{X}_1^\top, \mathbf{X}_2^\top)^\top$  and the characteristic function of  $\mathbf{R}$  be  $\psi_{\mathbf{R}}(\mathbf{t}) = \varphi(\mathbf{t}^\top \boldsymbol{\Theta}\mathbf{t})$ , where

$$\boldsymbol{\Theta} = \begin{pmatrix} \boldsymbol{\Sigma} & \boldsymbol{\Sigma}_1 \\ \boldsymbol{\Sigma}_1^\top & \boldsymbol{\Sigma} \end{pmatrix}.$$

Suppose  $\tilde{\mathbf{R}} = (\tilde{\mathbf{X}}_1^\top, \tilde{\mathbf{X}}_2^\top)^\top$  is an independent copy of  $\mathbf{R}$ . The characteristic function of  $\mathbf{R} - \tilde{\mathbf{R}}$  is

$$\begin{aligned} \psi_{\mathbf{R}-\tilde{\mathbf{R}}}(\mathbf{t}) &= \mathbb{E} \exp\{it^\top (\mathbf{R} - \tilde{\mathbf{R}})\} \\ &= \mathbb{E} \exp(it^\top \mathbf{R}) \mathbb{E} \exp(it^\top \tilde{\mathbf{R}}) = \varphi(\mathbf{t}^\top \boldsymbol{\Theta}\mathbf{t})^2. \end{aligned}$$

Thus,  $\mathbf{R} - \tilde{\mathbf{R}}$  is also an elliptical random vector with scatter  $\boldsymbol{\Theta}$ . Suppose  $\mathbf{R} - \tilde{\mathbf{R}} \sim \text{EC}_{2d}(\mathbf{0}, \boldsymbol{\Theta}, \nu)$ . Let  $r_{\boldsymbol{\Theta}} = \text{rank}(\boldsymbol{\Theta})$  be the rank of  $\boldsymbol{\Theta}$ . For any  $j \in \{1, \dots, d\}$ , since  $X_{1j} - \tilde{X}_{1j}$  can be obtained by a linear transformation of  $\mathbf{R} - \tilde{\mathbf{R}}$ , by Proposition 2.3, we have

$$X_{1j} - \tilde{X}_{1j} \sim \text{EC}_1(0, \boldsymbol{\Sigma}_{jj}, \nu\sqrt{D}),$$

where  $D \sim \text{Beta}(1/2, (r_{\boldsymbol{\Theta}} - 1)/2)$  is a Beta random variable. Thus, we have

$$(X_{1j} - \tilde{X}_{1j}) \stackrel{d}{=} \sqrt{\boldsymbol{\Sigma}_{jj}} \nu \sqrt{D}.$$

By the definition of  $\mathbf{R}_{jj}^{\mathbf{Q}}$ , we have

$$\begin{aligned} \mathbf{R}_{jj}^{\mathbf{Q}} &= Q(|X_{1j} - \tilde{X}_{1j}|; 1/4)^2 = Q\{(X_{1j} - \tilde{X}_{1j})^2; 1/4\} \\ &= \boldsymbol{\Sigma}_{jj} Q(\nu^2 D; 1/4). \end{aligned} \quad (\text{A.10})$$

Now, for  $j, k, j', k' \in \{1, \dots, d\}$  and  $j \neq k$ , let

$$\begin{aligned} X_{jk}^+ &:= X_{1j} + X_{1k}, & X_{jk}^- &:= X_{1j} - X_{1k}, \\ \tilde{X}_{jk}^+ &:= \tilde{X}_{1j} + \tilde{X}_{1k}, & \tilde{X}_{jk}^- &:= \tilde{X}_{1j} - \tilde{X}_{1k}, \\ Y_{j'k'}^+ &:= X_{1j'} + X_{2k'}, & Y_{j'k'}^- &:= X_{1j'} - X_{2k'}, \\ \tilde{Y}_{j'k'}^+ &:= \tilde{X}_{1j'} + \tilde{X}_{2k'}, & \tilde{Y}_{j'k'}^- &:= \tilde{X}_{1j'} - \tilde{X}_{2k'}. \end{aligned}$$

Apply Proposition 2.3, we have

$$\begin{aligned} X_{jk}^+ - \tilde{X}_{jk}^+ &\sim \text{EC}_1(0, \boldsymbol{\Sigma}_{jj} + \boldsymbol{\Sigma}_{kk} + 2\boldsymbol{\Sigma}_{jk}, \nu\sqrt{D}), \\ X_{jk}^- - \tilde{X}_{jk}^- &\sim \text{EC}_1(0, \boldsymbol{\Sigma}_{jj} + \boldsymbol{\Sigma}_{kk} - 2\boldsymbol{\Sigma}_{jk}, \nu\sqrt{D}), \\ Y_{j'k'}^+ - \tilde{Y}_{j'k'}^+ &\sim \text{EC}_1(0, \boldsymbol{\Sigma}_{j'j'} + \boldsymbol{\Sigma}_{k'k'} + 2(\boldsymbol{\Sigma}_1)_{j'k'}, \nu\sqrt{D}), \\ Y_{j'k'}^- - \tilde{Y}_{j'k'}^- &\sim \text{EC}_1(0, \boldsymbol{\Sigma}_{j'j'} + \boldsymbol{\Sigma}_{k'k'} - 2(\boldsymbol{\Sigma}_1)_{j'k'}, \nu\sqrt{D}). \end{aligned}$$

Using the same technique as in (A.10), we can obtain

$$\begin{aligned} Q(|X_{jk}^+ - \tilde{X}_{jk}^+|; 1/4)^2 &= (\boldsymbol{\Sigma}_{jj} + \boldsymbol{\Sigma}_{kk} + 2\boldsymbol{\Sigma}_{jk}) Q(\nu^2 D; 1/4), \\ Q(|X_{jk}^- - \tilde{X}_{jk}^-|; 1/4)^2 &= (\boldsymbol{\Sigma}_{jj} + \boldsymbol{\Sigma}_{kk} - 2\boldsymbol{\Sigma}_{jk}) Q(\nu^2 D; 1/4), \\ Q(|Y_{j'k'}^+ - \tilde{Y}_{j'k'}^+|; 1/4)^2 &= \\ &= (\boldsymbol{\Sigma}_{j'j'} + \boldsymbol{\Sigma}_{k'k'} + 2(\boldsymbol{\Sigma}_1)_{j'k'}) Q(\nu^2 D; 1/4), \\ Q(|Y_{j'k'}^- - \tilde{Y}_{j'k'}^-|; 1/4)^2 &= \\ &= (\boldsymbol{\Sigma}_{j'j'} + \boldsymbol{\Sigma}_{k'k'} - 2(\boldsymbol{\Sigma}_1)_{j'k'}) Q(\nu^2 D; 1/4). \end{aligned}$$

Thus, by the definitions of  $\mathbf{R}_{jk}^{\mathbf{Q}}$  and  $(\mathbf{R}_1^{\mathbf{Q}})_{jk}$ , we have

$$\mathbf{R}_{jk}^{\mathbf{Q}} = \boldsymbol{\Sigma}_{jk} Q(\nu^2 D; 1/4) \quad (\text{A.11})$$

for  $j \neq k \in \{1, \dots, d\}$  and

$$(\mathbf{R}_1^{\mathbf{Q}})_{j'k'} = (\boldsymbol{\Sigma}_1)_{j'k'} Q(\nu^2 D; 1/4) \quad (\text{A.12})$$

for  $j', k' \in \{1, \dots, d\}$ . Combining (A.10), (A.11), and (A.12) leads to (3.11) and with  $m^{\mathbf{Q}} = Q(\nu^2 D; 1/4)$ .  $\square$

### A.2.3. PROOF OF THEOREM 5.2

*Proof.* We first prove (5.1). For brevity, we denote

$$\begin{aligned} \hat{\sigma}_j^{\mathbf{Q}} &:= \hat{\sigma}^{\mathbf{Q}}(\{X_{tj}\}_{t=1}^T), & \sigma_j^{\mathbf{Q}} &:= \sigma^{\mathbf{Q}}(X_j), \\ \hat{\sigma}_{jk+}^{\mathbf{Q}} &:= \hat{\sigma}^{\mathbf{Q}}(\{X_{tj} + X_{tk}\}_{t=1}^T), & \sigma_{jk+}^{\mathbf{Q}} &:= \sigma^{\mathbf{Q}}(X_{1j} + X_{1k}), \end{aligned}$$

$$\widehat{\sigma}_{jk-}^Q := \widehat{\sigma}^Q(\{X_{tj} - X_{tk}\}_{t=1}^T), \sigma_{jk-}^Q := \sigma^Q(X_{1j} - X_{1k}),$$

for  $j \neq k \in \{1, \dots, d\}$ . By definition, for any  $u > 0$ , we have

$$\begin{aligned} & \mathbb{P}(|\widehat{\mathbf{R}}_{jj}^Q - \mathbf{R}_{jj}^Q| \geq u) = \mathbb{P}(|\widehat{\sigma}_j^Q - \sigma_j^Q| \geq u) \\ & \leq \mathbb{P}(\{\widehat{\sigma}_j^Q - \sigma_j^Q\}^2 + 2\sigma_j^Q|\widehat{\sigma}_j^Q - \sigma_j^Q| \geq u) \\ & \leq \mathbb{P}\left(|\widehat{\sigma}_j^Q - \sigma_j^Q| \geq \sqrt{\frac{u}{2}}\right) + \mathbb{P}\left(|\widehat{\sigma}_j^Q - \sigma_j^Q| \geq \frac{u}{4\sigma_j^Q}\right). \end{aligned} \quad (\text{A.13})$$

The quantiles in the definitions of  $\mathbf{R}^Q$  and  $\widehat{\mathbf{R}}^Q$  are unique due to Condition 1 and absolute continuity of  $\mathbf{X}_1$ . Hence, applying Lemma A.5 and noting that  $\sigma_j^Q \leq \sigma_{\max}^Q$ , we have

$$\begin{aligned} & \mathbb{P}(|\widehat{\mathbf{R}}_{jj}^Q - \mathbf{R}_{jj}^Q| \geq u) \leq \\ & 2 \exp\left\{-\frac{T}{2(1+2\Theta(T))} \left(\eta\sqrt{\frac{u}{2}} - \frac{4\Theta(T)}{T}\right)^2\right\} + \\ & 2 \exp\left\{-\frac{T}{2(1+2\Theta(T))} \left(\frac{\eta u}{4\sigma_{\max}^Q} - \frac{4\Theta(T)}{T}\right)^2\right\}, \end{aligned} \quad (\text{A.14})$$

when  $4\Theta(T)/(\eta T) \leq \sqrt{u/2}$ ,  $u/(4\sigma_{\max}^Q) \leq \kappa$ . Now, for the off-diagonal entries, we have

$$\begin{aligned} & \mathbb{P}(|\widehat{\mathbf{R}}_{jk}^Q - \mathbf{R}_{jk}^Q| \geq u) \\ & \leq \mathbb{P}\left(|\widehat{\sigma}_{jk+}^Q - \sigma_{jk+}^Q| + |\widehat{\sigma}_{jk-}^Q - \sigma_{jk-}^Q| \geq 4u\right) \\ & \leq \mathbb{P}\left(|\widehat{\sigma}_{jk+}^Q - \sigma_{jk+}^Q| \geq 2u\right) + \mathbb{P}\left(|\widehat{\sigma}_{jk-}^Q - \sigma_{jk-}^Q| \geq 2u\right). \end{aligned}$$

Using the same technique as in (A.13), we further have

$$\begin{aligned} & \mathbb{P}(|\widehat{\mathbf{R}}_{jk}^Q - \mathbf{R}_{jk}^Q| \geq u) \\ & \leq \mathbb{P}\left(|\widehat{\sigma}_{jk+}^Q - \sigma_{jk+}^Q| \geq \sqrt{u}\right) + \mathbb{P}\left(|\widehat{\sigma}_{jk+}^Q - \sigma_{jk+}^Q| \geq \frac{u}{2\sigma_{jk+}^Q}\right) + \\ & \mathbb{P}\left(|\widehat{\sigma}_{jk-}^Q - \sigma_{jk-}^Q| \geq \sqrt{u}\right) + \mathbb{P}\left(|\widehat{\sigma}_{jk-}^Q - \sigma_{jk-}^Q| \geq \frac{u}{2\sigma_{jk-}^Q}\right). \end{aligned}$$

Applying Lemma A.5 and noting that  $\sigma_{jk+}^Q \leq \sigma_{\max}^Q$  and  $\sigma_{jk-}^Q \leq \sigma_{\max}^Q$ , we have

$$\begin{aligned} & \mathbb{P}(|\widehat{\mathbf{R}}_{jk}^Q - \mathbf{R}_{jk}^Q| \geq u) \leq \\ & 4 \exp\left\{-\frac{T}{2(1+2\Theta(T))} \left(\eta\sqrt{u} - \frac{4\Theta(T)}{T}\right)^2\right\} + \\ & 4 \exp\left\{-\frac{T}{2(1+2\Theta(T))} \left(\frac{\eta u}{2\sigma_{\max}^Q} - \frac{4\Theta(T)}{T}\right)^2\right\}, \end{aligned} \quad (\text{A.15})$$

when  $4\Theta(T)/(\eta T) \leq \sqrt{u}$ ,  $u/(2\sigma_{\max}^Q) \leq \kappa$ . Combining (A.14) and (A.15), we obtain

$$\mathbb{P}(\|\widehat{\mathbf{R}}^Q - \mathbf{R}^Q\|_{\max} \geq u) \leq \sum_{j,k=1}^d \mathbb{P}(|\widehat{\mathbf{R}}_{jk}^Q - \mathbf{R}_{jk}^Q| \geq u)$$

$$\begin{aligned} & \leq 4d^2 \left[ \exp\left\{-\frac{T}{2(1+2\Theta(T))} \left(\eta\sqrt{\frac{u}{2}} - \frac{4\Theta(T)}{T}\right)^2\right\} + \right. \\ & \left. \exp\left\{-\frac{T}{2(1+2\Theta(T))} \left(\frac{\eta u}{4\sigma_{\max}^Q} - \frac{4\Theta(T)}{T}\right)^2\right\} \right] \\ & \leq 8 \max\left\{ \underbrace{d^2 \exp\left[-\frac{T}{2(1+2\Theta(T))} \left(\eta\sqrt{\frac{u}{2}} - \frac{4\Theta(T)}{T}\right)^2\right]}_{A_1(u)}, \right. \\ & \left. \underbrace{d^2 \exp\left[-\frac{T}{2(1+2\Theta(T))} \left(\frac{\eta u}{4\sigma_{\max}^Q} - \frac{4\Theta(T)}{T}\right)^2\right]}_{A_2(u)} \right\}, \end{aligned}$$

when we have

$$\frac{4\Theta(T)}{\eta T} \leq \sqrt{\frac{u}{2}}, \sqrt{u}, \frac{u}{4\sigma_{\max}^Q}, \frac{u}{2\sigma_{\max}^Q} \leq \kappa. \quad (\text{A.16})$$

Setting  $A_1(u_1) = 1/d^2$ , we obtain

$$u_1 = \frac{2}{\eta^2} \left[ \sqrt{\frac{8(1+2\Theta(T)) \log d}{T}} + \frac{4\Theta(T)}{T} \right]^2.$$

Setting  $A_2(u_2) = 1/d^2$ , we obtain

$$u_2 = \frac{4\sigma_{\max}^Q}{\eta} \left[ \sqrt{\frac{8(1+2\Theta(T)) \log d}{T}} + \frac{4\Theta(T)}{T} \right].$$

Now set  $u = r(T) = \max(u_1, u_2)$ . (A.16) is satisfied when  $T$  is large enough. If  $u_1 \geq u_2$ , since  $A_2(u)$  is a non-increasing function of  $u$ , we have  $A_2(u_1) \leq A_2(u_2) = 1/d^2$ . Thus, we have

$$\mathbb{P}(\|\widehat{\mathbf{R}}^Q - \mathbf{R}^Q\|_{\max} \geq r(T)) \leq 8 \max\{A_1(u), A_2(u)\} \leq 8/d^2.$$

On the other hand, if  $u_1 < u_2$ , we have  $r(T) = u_2$ . Since  $A_1(u)$  is a non-increasing function of  $u$ , we have  $A_1(u_2) \leq A_1(u_1) = 1/d^2$ . Thus, we still have

$$\mathbb{P}(\|\widehat{\mathbf{R}}^Q - \mathbf{R}^Q\|_{\max} \geq r(T)) \leq 8 \max\{A_1(u), A_2(u)\} \leq 8/d^2.$$

This proves (5.1).

To prove (5.2), we employ the same technique as above. Specifically, denote

$$\begin{aligned} \widehat{\tau}_{j'k'+}^Q & := \widehat{\sigma}^Q(\{X_{tj'} + X_{t+1,k'}\}_{t=1}^{T-1}), \tau_{j'k'+}^Q := \sigma^Q(X_{1j'} + X_{2k'}), \\ \widehat{\tau}_{j'k'-}^Q & := \widehat{\sigma}^Q(\{X_{tj'} - X_{t+1,k'}\}_{t=1}^{T-1}), \tau_{j'k'-}^Q := \sigma^Q(X_{1j'} - X_{2k'}), \end{aligned}$$

for  $j', k' \in \{1, \dots, d\}$ . Using the same technique in deriving (A.15), we can obtain

$$\begin{aligned} & \mathbb{P}(|(\widehat{\mathbf{R}}_1^Q)_{j'k'} - (\mathbf{R}_1^Q)_{j'k'}| \geq u) \leq \\ & 4 \exp\left\{-\frac{T-1}{2(1+2\Theta(T-1))} \left(\eta\sqrt{u} - \frac{4\Theta(T-1)}{T-1}\right)^2\right\} + \\ & 4 \exp\left\{-\frac{T-1}{2(1+2\Theta(T-1))} \left(\frac{\eta u}{2\sigma_{\max}^Q} - \frac{4\Theta(T-1)}{T-1}\right)^2\right\}, \end{aligned} \quad (\text{A.17})$$

when  $4\Theta(T-1)/(\eta(T-1)) \leq \sqrt{u}$ ,  $u/(2\sigma_{\max}^Q) \leq \kappa$ . Hence, we obtain

$$\begin{aligned} \mathbb{P}(\|\widehat{\mathbf{R}}_1^Q - \mathbf{R}_1^Q\|_{\max} \geq u) &\leq \sum_{j',k'=1}^d \mathbb{P}(|\widehat{\mathbf{R}}_{j'k'}^Q - \mathbf{R}_{j'k'}^Q| \geq u) \\ &\leq 8 \max \left\{ \underbrace{d^2 \exp \left[ -\frac{T}{4(1+2\Theta(T))} \left( \eta\sqrt{u} - \frac{8\Theta(T)}{T} \right)^2 \right]}_{B_1(u)}, \right. \\ &\quad \left. \underbrace{d^2 \exp \left[ -\frac{T}{4(1+2\Theta(T))} \left( \frac{\eta u}{2\tau_{\max}^Q} - \frac{8\Theta(T)}{T} \right)^2 \right]}_{B_2(u)} \right\}, \end{aligned}$$

when we have

$$\frac{8\Theta(T)}{\eta T} \leq \sqrt{u}, \quad \frac{u}{2\tau_{\max}^Q} \leq \kappa. \quad (\text{A.18})$$

Here we used the fact that  $\Theta(T-1) \leq \Theta(T)$  and  $T-1 > T/2$  when  $T > 3$ . Again, (A.18) can be fulfilled when  $T$  is large enough. Setting  $B_1(u_3) = 1/d^2$ , we obtain

$$u_3 = \frac{1}{\eta^2} \left[ \sqrt{\frac{16(1+2\Theta(T)) \log d}{T}} + \frac{8\Theta(T)}{T} \right]^2.$$

Setting  $B_2(u_4) = 1/d^2$ , we obtain

$$u_4 = \frac{2\tau_{\max}^Q}{\eta} \left[ \sqrt{\frac{16(1+2\Theta(T)) \log d}{T}} + \frac{8\Theta(T)}{T} \right].$$

Let  $r_1(T) = \max(u_3, u_4)$ . Using the same argument as in deriving (5.1), we may conclude that

$$\mathbb{P}(\|\widehat{\mathbf{R}}_1^Q - \mathbf{R}_1^Q\|_{\max} \geq r_1(T)) \leq 8/d^2.$$

This completes the proof.  $\square$

#### A.2.4. PROOF OF THEOREM 5.3

*Proof.* We first show that with large probability,  $\mathbf{A}$  is feasible to the optimization problem (4.1). By Theorem 3.7, we have  $\mathbf{A}^\top = (\mathbf{R}^Q)^{-1} \mathbf{R}_1^Q$ . Thus, we have

$$\begin{aligned} \|\widehat{\mathbf{R}}^Q \mathbf{A}^\top - \widehat{\mathbf{R}}_1^Q\|_{\max} &= \|\widehat{\mathbf{R}}^Q (\mathbf{R}^Q)^{-1} \mathbf{R}_1^Q - \widehat{\mathbf{R}}_1^Q\|_{\max} \\ &= \|\widehat{\mathbf{R}}^Q (\mathbf{R}^Q)^{-1} \mathbf{R}_1^Q - \mathbf{R}_1^Q + \mathbf{R}_1^Q - \widehat{\mathbf{R}}_1^Q\|_{\max} \\ &\leq \|\widehat{\mathbf{R}}^Q (\mathbf{R}^Q)^{-1} - \mathbf{I}\|_{\max} \|\mathbf{R}_1^Q\|_{\max} + \|\mathbf{R}_1^Q - \widehat{\mathbf{R}}_1^Q\|_{\max} \\ &= \|(\widehat{\mathbf{R}}^Q - \mathbf{R}^Q) \mathbf{A}\|_{\max} + \|\mathbf{R}_1^Q - \widehat{\mathbf{R}}_1^Q\|_{\max} \\ &\leq \|\widehat{\mathbf{R}}^Q - \mathbf{R}^Q\|_{\max} \|\mathbf{A}\|_1 + \|\mathbf{R}_1^Q - \widehat{\mathbf{R}}_1^Q\|_{\max} \\ &\leq \|\widehat{\mathbf{R}}^Q - \mathbf{R}^Q\|_{\max} M_T + \|\mathbf{R}_1^Q - \widehat{\mathbf{R}}_1^Q\|_{\max}. \end{aligned}$$

The last inequality is due to  $\mathbf{A} \in \mathcal{M}(\alpha, s, M_T)$ . By Lemma 5.2, we have, with probability no smaller than  $1 - 8/d^2$ ,

$$\|\widehat{\mathbf{R}}^Q \mathbf{A}^\top - \widehat{\mathbf{R}}_1^Q\|_{\max} \leq r(T) M_T + r_1(T)$$

$$\leq (1 + M_T) r_{\max}(T) = \lambda.$$

Next, we prove (5.5). Using  $\mathbf{A}^\top = (\mathbf{R}^Q)^{-1} \mathbf{R}_1^Q$ , we have

$$\begin{aligned} \|\widehat{\mathbf{A}} - \mathbf{A}\|_{\max} &= \|\widehat{\mathbf{A}} - (\mathbf{R}^Q)^{-1} \mathbf{R}_1^Q\|_{\max} \\ &= \|(\mathbf{R}^Q)^{-1} (\mathbf{R}^Q \widehat{\mathbf{A}} - \mathbf{R}_1^Q)\|_{\max} \\ &= \|(\mathbf{R}^Q)^{-1} (\mathbf{R}^Q \widehat{\mathbf{A}} - \widehat{\mathbf{R}}^Q \widehat{\mathbf{A}} + \widehat{\mathbf{R}}^Q \widehat{\mathbf{A}} - \mathbf{R}_1^Q + \widehat{\mathbf{R}}^Q \widehat{\mathbf{A}} - \widehat{\mathbf{R}}_1^Q)\|_{\max} \\ &\leq \|(\mathbf{R}^Q)^{-1}\|_1 (\|\mathbf{R}^Q - \widehat{\mathbf{R}}^Q\|_{\max} \|\widehat{\mathbf{A}}\|_1 + \\ &\quad \|\widehat{\mathbf{R}}_1^Q - \mathbf{R}_1^Q\|_{\max} + \|\widehat{\mathbf{R}}^Q \widehat{\mathbf{A}} - \widehat{\mathbf{R}}_1^Q\|_{\max}). \end{aligned}$$

Since  $\mathbf{A}$  is feasible to optimization problem (4.1) with probability no smaller than  $1 - 1/d^2$ , and  $\widehat{\mathbf{A}}$  is the solution to (4.1), we have  $\|\widehat{\mathbf{A}}\|_1 \leq \|\mathbf{A}\|_1$  with probability no smaller than  $1 - 1/d^2$ . Using Lemma 5.2 and  $\|\widehat{\mathbf{R}}^Q \widehat{\mathbf{A}} - \widehat{\mathbf{R}}_1^Q\|_{\max} \leq \lambda$ , we further have

$$\begin{aligned} \|\widehat{\mathbf{A}} - \mathbf{A}\|_{\max} &\leq \|(\mathbf{R}_1^Q)^{-1}\|_1 [r(T) \|\mathbf{A}\|_1 + r_1(T) + (1 + M_T) r_{\max}(T)] \\ &\leq 2 \|(\mathbf{R}_1^Q)^{-1}\|_1 (1 + M_T) r_{\max}(T), \end{aligned}$$

with probability no smaller than  $1 - 1/d^2$ . This proves (5.5).

To prove (5.6), let  $\lambda_1$  be a parameter to be defined later, and denote

$$s_1 := \max_{1 \leq j \leq d} \sum_{k=1}^d \min(|\mathbf{A}_{jk}/\lambda_1|, 1) \text{ and } S_j := \{k : |\mathbf{A}_{jk}| \leq \lambda_1\}.$$

It follows that  $|S_j| \leq s_1$ , where  $|S_j|$  denote the cardinality of  $S_j$ . We have

$$\begin{aligned} \|\widehat{\mathbf{A}}_{j,*} - \mathbf{A}_{j,*}\|_1 &\leq \|\widehat{\mathbf{A}}_{j,S_j^c}\|_1 + \|\mathbf{A}_{j,S_j^c}\|_1 \\ &\quad + \|\widehat{\mathbf{A}}_{j,S_j} - \mathbf{A}_{j,S_j}\|_1. \end{aligned} \quad (\text{A.19})$$

By the equivalence of (4.1) and (4.2), we have  $\|\widehat{\mathbf{A}}_{j,*}\|_1 \leq \|\mathbf{A}_{j,*}\|_1$  for any  $j \in \{1, \dots, d\}$ , with probability no smaller than  $1 - 1/d^2$ . Thus, we have

$$\begin{aligned} \|\widehat{\mathbf{A}}_{j,S_j^c}\|_1 &= \|\widehat{\mathbf{A}}_{j,*}\|_1 - \|\widehat{\mathbf{A}}_{j,S_j}\|_1 \leq \|\mathbf{A}_{j,*}\|_1 - \|\widehat{\mathbf{A}}_{j,S_j}\|_1 \\ &= \|\mathbf{A}_{j,S_j}\|_1 + \|\mathbf{A}_{j,S_j^c}\|_1 - \|\widehat{\mathbf{A}}_{j,S_j}\|_1 \\ &\leq \|\mathbf{A}_{j,S_j} - \widehat{\mathbf{A}}_{j,S_j}\|_1 + \|\mathbf{A}_{j,S_j^c}\|_1 \end{aligned}$$

Plugging the above equation into (A.19), we obtain

$$\|\widehat{\mathbf{A}}_{j,*} - \mathbf{A}_{j,*}\|_1 \leq 2 \|\mathbf{A}_{j,S_j^c}\|_1 + 2 \|\widehat{\mathbf{A}}_{j,S_j} - \mathbf{A}_{j,S_j}\|_1. \quad (\text{A.20})$$

When  $k \notin S_j$ , we have  $\mathbf{A}_{jk} < \lambda_1$ . Thus, we have

$$\begin{aligned} \|\mathbf{A}_{j,S_j^c}\|_1 &= \lambda_1 \sum_{k \in S_j^c} |\mathbf{A}_{jk}|/\lambda_1 \\ &= \lambda_1 \sum_{k \in S_j^c} \min(|\mathbf{A}_{jk}|/\lambda_1, 1) \leq \lambda_1 s_1. \end{aligned} \quad (\text{A.21})$$

Regarding the second term on the right hand side of (A.20), we have

$$\begin{aligned} \|\widehat{\mathbf{A}}_{j,S_j} - \mathbf{A}_{j,S_j}\|_1 &\leq \|\widehat{\mathbf{A}} - \mathbf{A}\|_{\max} |S_j| \\ &\leq 2\|(\mathbf{R}_1^Q)^{-1}\|_1 (1 + M_T) r_{\max}(T) s_1. \end{aligned} \quad (\text{A.22})$$

Combining (A.19), (A.21), and (A.22), we have

$$\|\widehat{\mathbf{A}}_{j,*} - \mathbf{A}_{j,*}\|_1 \leq [2\lambda_1 + 4\|(\mathbf{R}_1^Q)^{-1}\|_1 (1 + M_T) r_{\max}(T)] s_1.$$

Let  $\lambda_1 = 2\|(\mathbf{R}_1^Q)^{-1}\|_1 (1 + M_T) r_{\max}(T)$ , we have  $\|\widehat{\mathbf{A}}_{j,*} - \mathbf{A}_{j,*}\|_1 \leq 4\lambda_1 s_1$ . By the definition of  $s_1$ , since  $\alpha \in [0, 1)$ , we have

$$\begin{aligned} s_1 &\leq \max_{1 \leq j \leq d} \sum_{k=1}^d \min(|\mathbf{A}_{jk}|^\alpha / \lambda_1^\alpha, 1) \\ &\leq \max_{1 \leq j \leq d} \sum_{k=1}^d |\mathbf{A}_{jk}|^\alpha / \lambda_1^\alpha \leq s / \lambda_1^\alpha. \end{aligned}$$

Hence, we have

$$\begin{aligned} \|\widehat{\mathbf{A}}_{j,*} - \mathbf{A}_{j,*}\|_1 &\leq 4\lambda_1^{1-\alpha} s \\ &= 4s \left[ 2\|(\mathbf{R}_1^Q)^{-1}\|_1 (1 + M_T) r_{\max}(T) \right]^{1-\alpha}. \end{aligned}$$

Since the above equation holds for any  $j \in \{1, \dots, d\}$ , we have (5.6).  $\square$

#### A.2.5. PROOF OF THEOREM 6.2

*Proof.* In order to prove Claim 1, we only need to prove that  $\{X_{tk}\}_{t \in \mathbb{Z}}$  doesn't Granger cause  $\{X_{tj}\}_{t \in \mathbb{Z}}$  implies  $\mathbf{A}_{jk} = 0$ . Suppose for some  $t \in \mathbb{Z}$ , we have

$$\mathbb{P}(X_{t+1,j} \in A \mid \{\mathbf{X}_s\}_{s \leq t}) = \mathbb{P}(X_{t+1,j} \in A \mid \{\mathbf{X}_{s,\setminus k}\}_{s \leq t}),$$

for any measurable set  $A$ . The above equation implies that conditioning on  $\{\mathbf{X}_{s,\setminus k}\}_{s \leq t}$ ,  $X_{t+1,j}$  is independent of  $\{X_{sk}\}_{s \leq t}$ . Hence, we have

$$\text{Cov}(X_{t+1,j}, X_{tk} \mid \{\mathbf{X}_{s,\setminus k}\}_{s \leq t}) = 0.$$

Plugging  $X_{t+1,j} = \sum_{l=1}^d \mathbf{A}_{jl} X_{tl} + E_{t+1,j}$  into the above equation, we have

$$\begin{aligned} 0 &= \text{Cov}(\mathbf{A}_{jk} X_{tk}, X_{tk} \mid \{\mathbf{X}_{s,\setminus k}\}_{s \leq t}) + \\ &\quad \text{Cov}\left(\sum_{l \neq k} \mathbf{A}_{jl} X_{tl}, X_{tk} \mid \{\mathbf{X}_{s,\setminus k}\}_{s \leq t}\right) + \\ &\quad \text{Cov}(E_{t+1,j}, X_{tk} \mid \{\mathbf{X}_{s,\setminus k}\}_{s \leq t}). \end{aligned}$$

The second term on the right hand side is 0, since given  $\{\mathbf{X}_{s,\setminus k}\}_{s \leq t}$ ,  $\sum_{l \neq k} \mathbf{A}_{jl} X_{tl}$  is constant. Since  $(\boldsymbol{\Omega}_{XE})_{jk} = 0$  for  $j \leq k$ , we have  $\text{Cov}(E_{t+1,j}, X_{sk}) = 0$  for any  $s \leq t$ . Using Theorem 2.18 in Fang et al. (1990), we have the third

term is also 0. Thus, we have  $\mathbf{A}_{jk} \text{Var}(X_{tk} \mid \{\mathbf{X}_{s,\setminus k}\}_{s \leq t}) = 0$ , and hence  $\mathbf{A}_{jk} = 0$ . This proves Claim 1.

Given Claim 1, to prove Claim 2, it remains to prove that  $\mathbf{A}_{jk} = 0$  implies that  $\{X_{tk}\}_{t \in \mathbb{Z}}$  doesn't Granger cause  $\{X_{tj}\}_{t \in \mathbb{Z}}$ . Since  $\mathbf{A}_{jk} = 0$ , we have

$$\begin{aligned} &p(X_{t+1,j}, \{X_{sk}\}_{s \leq t} \mid \{\mathbf{X}_{s,\setminus k}\}_{s \leq t}) \\ &= p\left(\sum_{l \neq k} \mathbf{A}_{jl} X_{tl} + E_{t+1,j}, \{X_{sk}\}_{s \leq t} \mid \{\mathbf{X}_{s,\setminus k}\}_{s \leq t}\right) \\ &= p\left(\sum_{l \neq k} \mathbf{A}_{jl} X_{tl} + E_{t+1,j} \mid \{\mathbf{X}_{s,\setminus k}\}_{s \leq t}\right) \cdot \\ &\quad p(\{X_{sk}\}_{s \leq t} \mid \{\mathbf{X}_{s,\setminus k}\}_{s \leq t}). \end{aligned}$$

Here  $p$  is the conditional probability density function. The last equation is because  $E_{t+1,j}$  is independent of  $\{\mathbf{X}_s\}_{s \leq t}$ , and the fact that  $\sum_{l \neq k} \mathbf{A}_{jl} X_{tl}$  is constant given  $\{\mathbf{X}_{s,\setminus k}\}_{s \leq t}$ . Hence, we have

$$\begin{aligned} &p(X_{t+1,j}, \{X_{sk}\}_{s \leq t} \mid \{\mathbf{X}_{s,\setminus k}\}_{s \leq t}) \\ &= p(X_{t+1,j} \mid \{\mathbf{X}_{s,\setminus k}\}_{s \leq t}) p(\{X_{sk}\}_{s \leq t} \mid \{\mathbf{X}_{s,\setminus k}\}_{s \leq t}), \end{aligned}$$

and thus

$$p(X_{t+1,j} \mid \{\mathbf{X}_s\}_{s \leq t}) = p(X_{t+1,j} \mid \{\mathbf{X}_{s,\setminus k}\}_{s \leq t}).$$

This completes the proof.  $\square$

#### A.2.6. PROOF OF THEOREM 6.4

*Proof.* Theorem 6.4 is a consequence of Theorem 5.3. In detail, if  $\mathbf{A}_{jk} > 0$ , by (6.1), we have  $\mathbf{A}_{jk} \geq 2\gamma$ . By Theorem 5.3, with probability no smaller than  $1 - 8/d^2$ , we have  $|\widehat{\mathbf{A}}_{jk} - \mathbf{A}_{jk}| \leq \gamma$ . Thus, we have  $\widehat{\mathbf{A}}_{jk} \geq \gamma$  with probability no smaller than  $1 - 8/d^2$ . By the definition of  $\widetilde{\mathbf{A}}$ , we have  $\widetilde{\mathbf{A}}_{jk} = \widehat{\mathbf{A}}_{jk} \geq \gamma > 0$ .

If  $\mathbf{A}_{jk} < 0$ , by (6.1), we have  $\mathbf{A}_{jk} \leq -2\gamma$ . Using Theorem 5.3, we have  $\widehat{\mathbf{A}}_{jk} \leq -\gamma$  with probability no smaller than  $1 - 8/d^2$ . By the definition of  $\widetilde{\mathbf{A}}$ , we have  $\widetilde{\mathbf{A}}_{jk} = \widehat{\mathbf{A}}_{jk} \leq -\gamma < 0$ .

If  $\mathbf{A}_{jk} = 0$ , using Theorem 5.3, we have  $\widehat{\mathbf{A}}_{jk} < \gamma$  with probability no smaller than  $1 - 8/d^2$ , since  $\mathbb{P}(\widehat{\mathbf{A}}_{jk} = \gamma) = 0$ . By the definition of  $\widetilde{\mathbf{A}}$ , we have  $\widetilde{\mathbf{A}}_{jk} = 0$ .  $\square$

## References

- Fang, Kai-Tai, Kotz, Samuel, and Ng, Kai Wang. *Symmetric Multivariate and Related Distributions*. Chapman and Hall, 1990.
- Kontorovich, Leonid Aryeh, Ramanan, Kavita, et al. Concentration inequalities for dependent random variables via the martingale method. *The Annals of Probability*, 36(6):2126–2158, 2008.

Mohri, Mehryar and Rostamizadeh, Afshin. Stability bounds for stationary  $\phi$ -mixing and  $\beta$ -mixing processes. *The Journal of Machine Learning Research*, 11:789–814, 2010.
